# Supplementary material
Source: PubMed Central journal article supplement (PMC3875134)

## Supplementary figure legends

Supplementary **Figure 1-E**. Multivariable adjusted hazard ratios and 95% confidence interval of ischemic stroke according to quartiles of plasma palmitoleic acid. Left: cholesterol ester fraction ( $p$  for linear trend across the quartiles  $<0.001$ ), right: phospholipid fraction ( $p$  for linear trend across the quartiles = 0.006).

Supplementary **Figure 1-F**. Multivariable adjusted hazard ratios and 95% confidence interval of ischemic stroke according to quartiles of plasma linoleic acid. Left: cholesterol ester fraction ( $p$  for linear trend across the quartiles = 0.13), right: phospholipid fraction ( $p$  for linear trend across the quartiles = 0.20).

Supplementary **Figure 1-G**. Multivariable adjusted hazard ratios and 95% confidence interval of ischemic stroke according to quartiles of plasma docosahexaenoic acid. Left: cholesterol ester fraction ( $p$  for linear trend across the quartiles = 0.18), right: phospholipid fraction ( $p$  for linear trend across the quartiles = 0.22).

Supplemental Figure 1-E

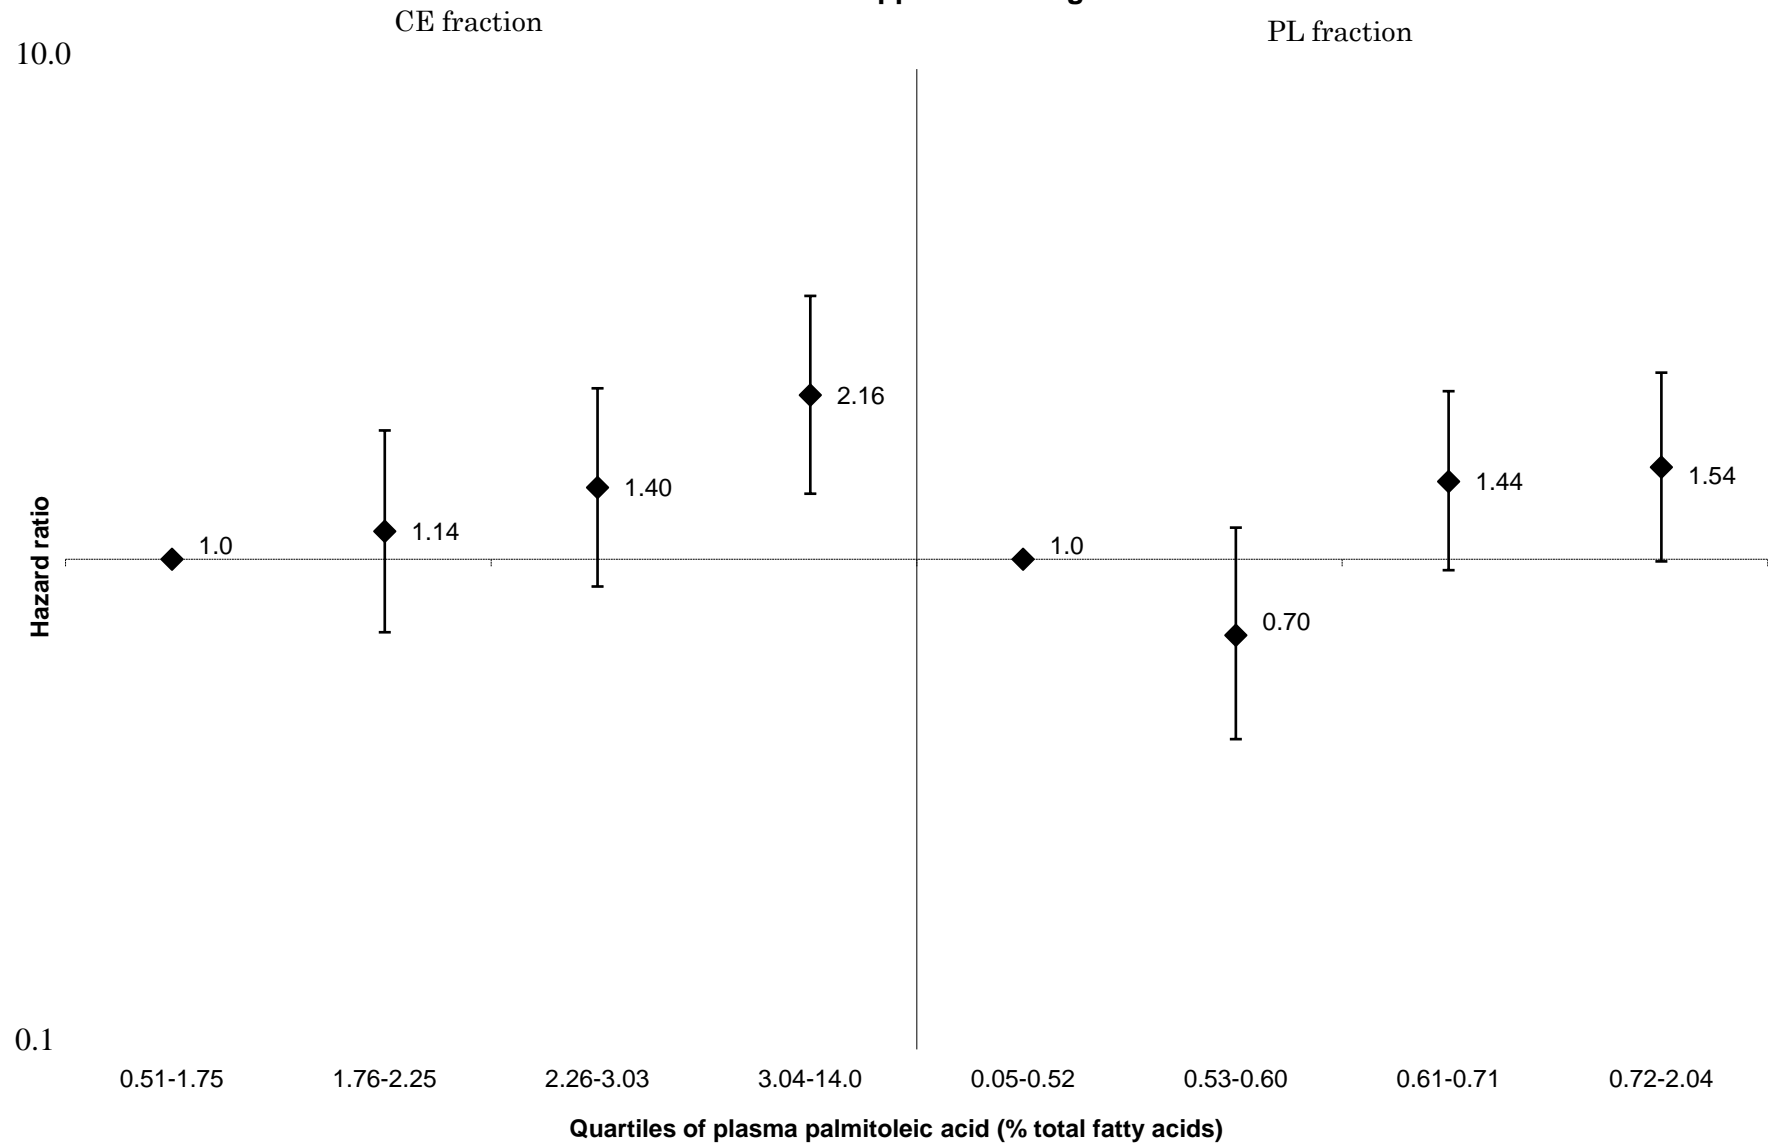

Supplemental Figure 1-F

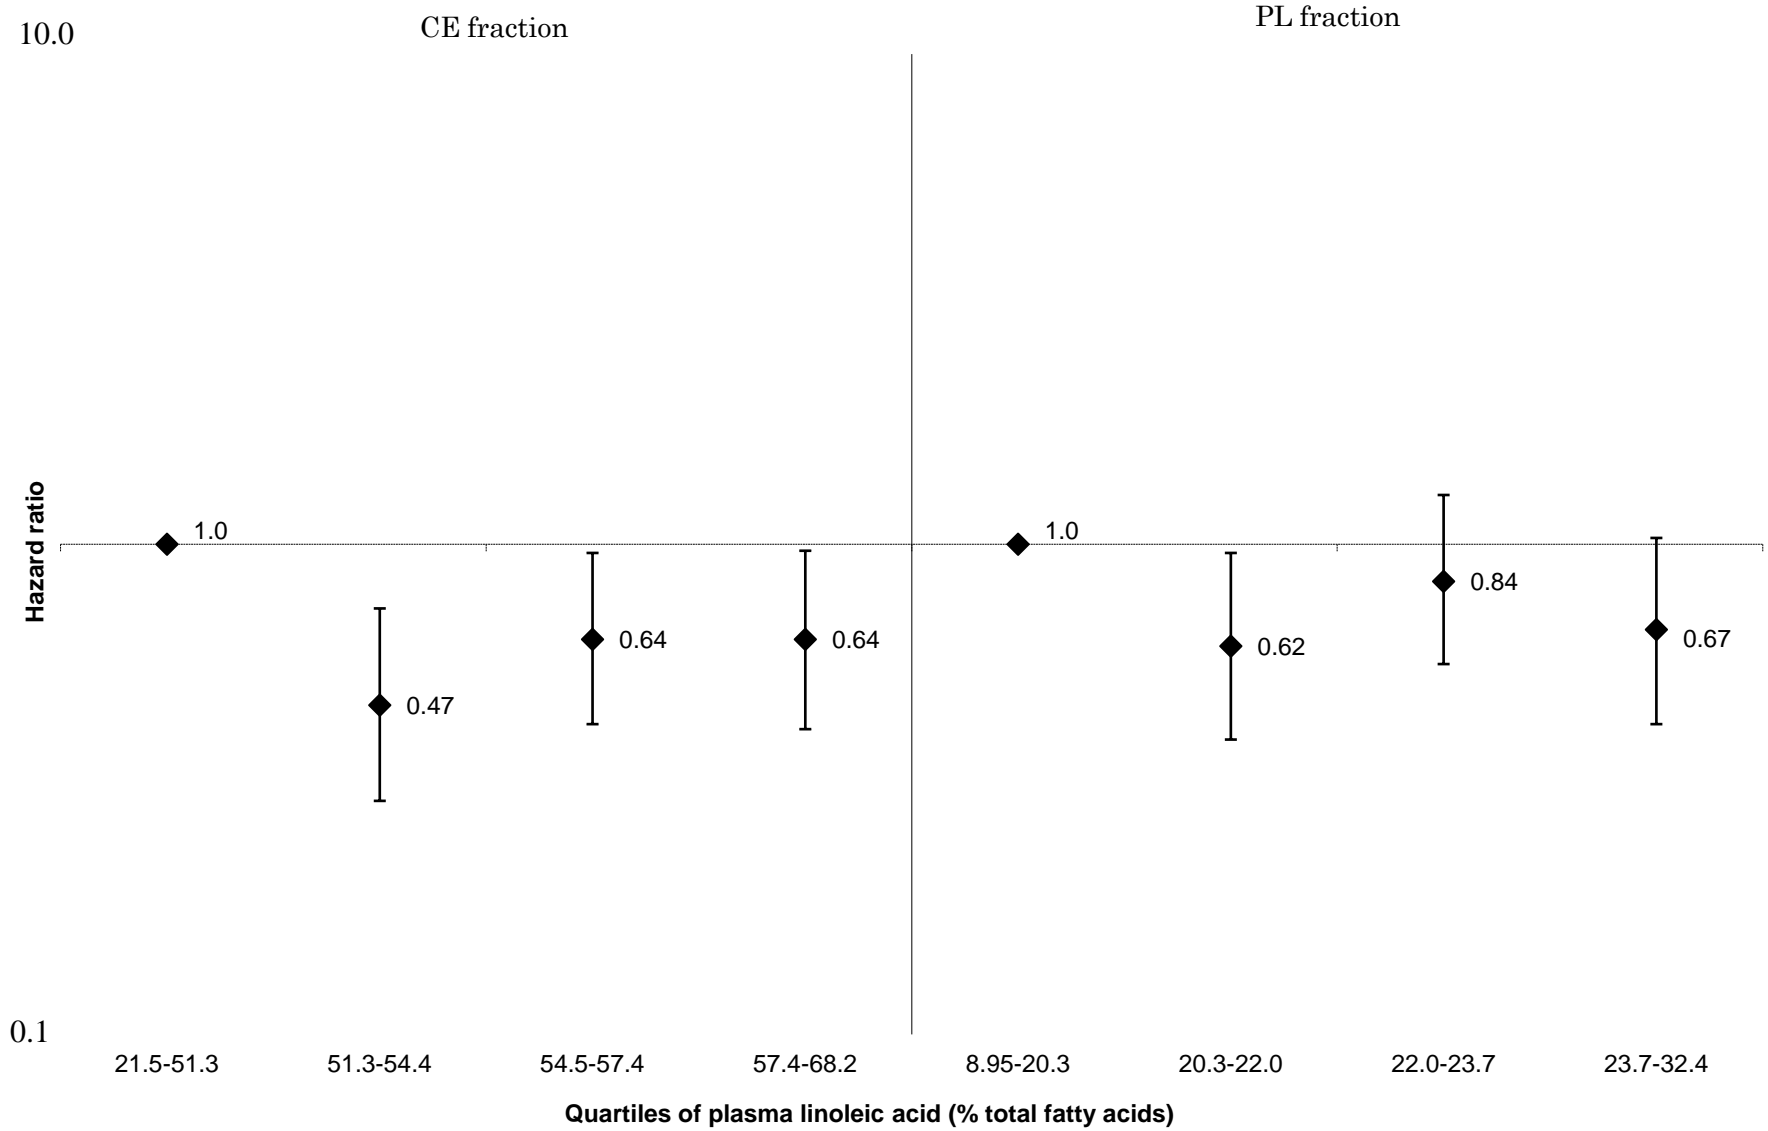

Supplemental Figure 1-G

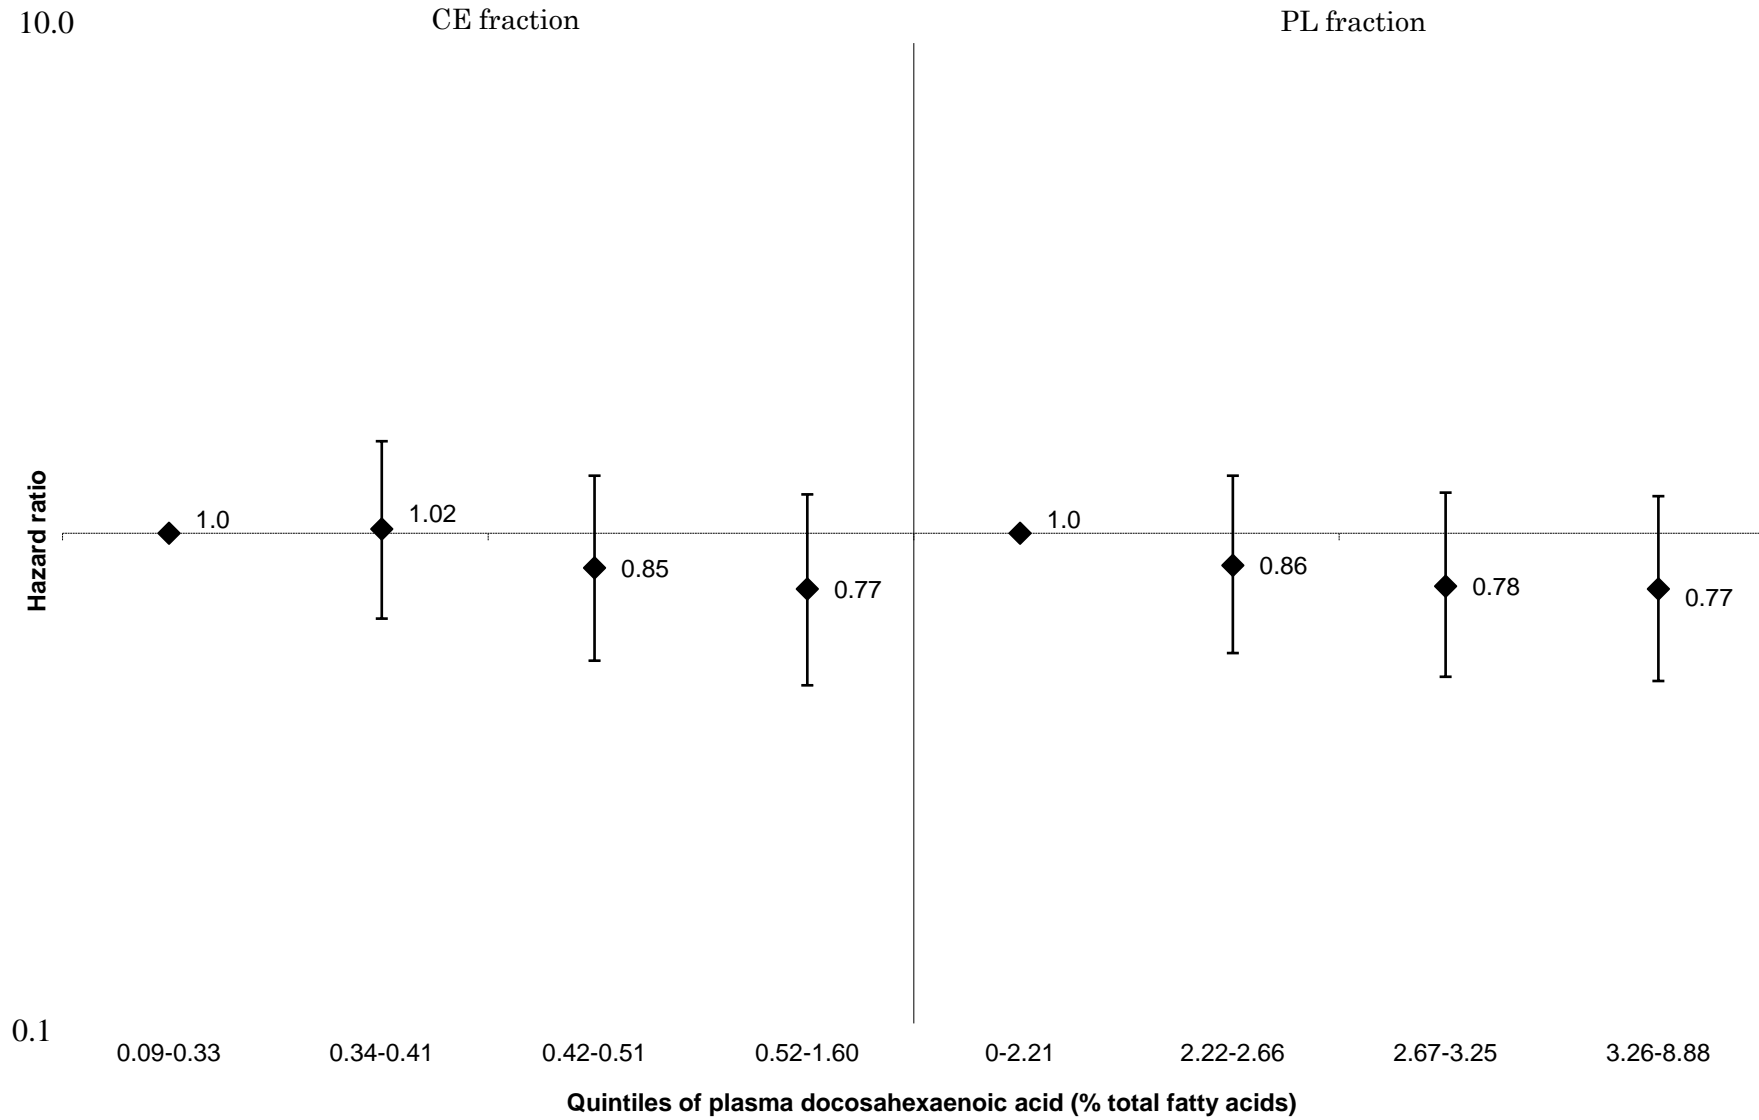

Supplement: NIHMS523935-supplement-Suppl__Figures.pdf [file NIHMS523935-supplement-Suppl__Figures.pdf]
